# Supplementary material
Source: PubMed Central journal article supplement (PMC3069164)

Kauralexin A3 <sup>1</sup>H (600 MHz), <sup>13</sup>C (151 MHz), HMBC and NOESY NMR spectroscopic data for diterpene acid aldehydes in CDCl<sub>3</sub>. Chemical shifts referenced to δ(CHCl<sub>3</sub>) = 7.26 ppm for <sup>1</sup>H and δ(CHCl<sub>3</sub>) = 77.36 ppm for <sup>13</sup>C. Coupling constants are given in Hertz [Hz].

| Position  | δ <sup>13</sup> C [ppm] | δ <sup>1</sup> H [ppm] | J coupling constants [Hz]                                | HMBC correlations (C. No)               | NOESY                                      |
|-----------|-------------------------|------------------------|----------------------------------------------------------|-----------------------------------------|--------------------------------------------|
| 1         | 40.1                    | 2H 1.83α* and 0.80β*   | 0.80, 1H, dt, J = 13.3, 4.0; 1.83, 1H, "dt", J = 13.1, 3 | Hα - C3 (weak), C5 (weak)               | Hβ - 0.99, 1.05, 1.15                      |
| 2         | 18.6                    | 2H 1.62α* and 1.45β*   | 1.45, 1H, J = 14.5                                       |                                         |                                            |
| 3         | 34.4                    | 2H 2.14α* and 0.99β*#  | 2.14 1H, "br d" J = 13.5; 0.99 1H, m                     | Hα - C1,C5; Hβ - C19                    |                                            |
| 4         | 48.7                    | -                      | -                                                        | -                                       | -                                          |
| 5         | 56.8                    | 1H 1.15*               | dd J=12.7, 1.9                                           | C1, C4, C18,C19, C6, C7, C20, C9        | 0.99, 1.05, 1.53                           |
| 6         | 20.5                    | 2H 1.90β and 1.68α*    | 1.90 1H, ddt J = 13.1, 2.4, 3.4                          |                                         | H β - 0.99, 9.73 (weak); Hα-9.73           |
| 7         | 41.1                    | 2H 1.53β and 1.63α     |                                                          |                                         |                                            |
| 8         | 45.3                    | -                      | -                                                        | -                                       | -                                          |
| 9         | 54.7                    | 1H 1.05*               | br d J = 6.6                                             | C20, C11, C10, C8, C12, C14, C16 (weak) | 0.80, 1.15, 1.68, 1.53                     |
| 10        | 39.4                    | -                      | -                                                        | -                                       | -                                          |
| 11        | 18.8                    | 2H 1.53α* and 1.65β    |                                                          |                                         | Hβ - 0.85                                  |
| 12        | 31.24                   | 2H 1.53*               |                                                          |                                         | 2.67                                       |
| 13        | 41.5                    | 1H 2.54*               | m                                                        |                                         | 1.88, 1.53, 1.24                           |
| 14        | 38.4                    | 2H 1.24* and 1.88*     | 1.24, 1H, m; 1.88, 1H, d, J = 12                         | H(1.24) - C8, C13; H(1.88) - C12        | H (1.88) - 0.85, 2.54                      |
| 15        | 44.6                    | 2H 1.68β* and 1.74α*   | 1.74, 1H, dd, J = 5.9, 13.5                              | Hβ - C9, C14, C17; Hα - C9, C17         | Hβ -1.05                                   |
| 16        | 45.2                    | 1H 2.67*               | dd J = 5.9, 9.1                                          | C12, C13, C14, C17                      | 1.53                                       |
| 17        | 181.9                   |                        |                                                          |                                         |                                            |
| H of COOH |                         | 10.1                   | br s                                                     |                                         |                                            |
| 18        | 24.5                    | 3H 0.99*#              | s                                                        | C3, C4#, C19#, C5#                      | 1.15, 1.90                                 |
| 19        | 206.2                   | 1H 9.73*               | d J = 1.3 Hz                                             | C3, C4                                  | 0.85, 0.99, 1.68, 1.90 (weak), 2.14 (weak) |
| 20        | 16.4                    | 3H 0.85*               | s                                                        | C5, C10, C9, C1 and/or C10              | 9.73, 1.68, 1.53, 1.65, 1.88, 1.62         |

\*Distinct proton chemical shifts from <sup>1</sup>H NMR 1D or 2D (COSY). The rest of the <sup>1</sup>H chemical shifts were deduced from HSQC. #Hβ at C3 and/or H at C18 have HMBC to C4, C5 and C19.

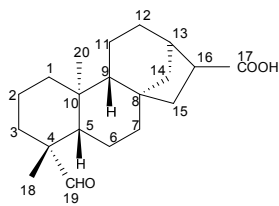

Supplement: 1014714108_st01.pdf [file 1014714108_st01.pdf]
