# Supplementary material
Source: PubMed Central journal article supplement (PMC3069164)

Kauralexin B2  $^1\text{H}$  (600 MHz),  $^{13}\text{C}$  (151 MHz), HMBC and NOESY NMR spectroscopic data for diterpene acid diacid in  $\text{CDCl}_3$ . Chemical shifts referenced to  $\delta(\text{CHCl}_3) = 7.26$  ppm for  $^1\text{H}$  and  $\delta(\text{CHCl}_3) = 77.36$  ppm for  $^{13}\text{C}$ . Coupling constants are given in Hertz [Hz].

| Position | $\delta^{13}\text{C}$ [ppm] | $\delta^1\text{H}$ [ppm]              | J coupling constants [Hz]    | HMBC correlations (C. No)                                        | NOESY                                  |
|----------|-----------------------------|---------------------------------------|------------------------------|------------------------------------------------------------------|----------------------------------------|
| 1        | 40.6                        | 2H 1.89 $\alpha^*$ and 0.81 $\beta^*$ | 0.81, 1H, ~dt, J = 13.2, 4.5 | H $\beta$ - C3, C5                                               | H $\alpha$ - 1.57;<br>H $\beta$ - 1.04 |
| 2        | 19.0                        | 2H 1.88 $\alpha^*$ and 1.45 $\beta$   |                              |                                                                  |                                        |
| 3        | 37.8                        | 2H 1.02 $\alpha^*$ and 2.16 $\beta^*$ | 2.16, 1H, "br d" J = 14      |                                                                  | H $\beta$ - 1.24                       |
| 4        | 43.7                        | -                                     | -                            | -                                                                | -                                      |
| 5        | 56.5                        | 1H 1.08*                              | 1H, dd, J = 12.0, 2.0        | C4, C20, C19,<br>C10, C6, C18<br>(weak)                          | 1.24                                   |
| 6        | 20.3                        | 2H 1.77 $\alpha^*$ and 1.85 $\beta$   | 1.77, 1H, ~dq, J = 2.8, 13.1 | H $\alpha$ -C7                                                   | H $\beta$ - 1.24;<br>H $\alpha$ - 0.99 |
| 7        | 38.3                        | 2H 1.67 $\alpha$ and 1.59 $\beta^*$   |                              | H $\alpha$ -C5, C6, C9,<br>C8 (weak);<br>H $\beta$ - C8, C9, C14 | H $\beta$ -6.50                        |
| 8        | 50.5                        | -                                     | -                            | -                                                                | -                                      |
| 9        | 45.9                        | 1H 1.04*                              | 1H, "br d", J = 8.4          | C11 (weak), C12                                                  | 0.81, 6.50,<br>1.57                    |
| 10       | 39.8                        | -                                     | -                            | -                                                                | -                                      |
| 11       | 18.6                        | 2H 1.57*                              |                              | C12                                                              | 1.89                                   |
| 12       | 25.3                        | 2H 1.50 and 1.61*                     |                              |                                                                  |                                        |
| 13       | 40.5                        | 1H 2.93*                              | m                            | C8 (weak)                                                        | 2.14                                   |
| 14       | 43.3                        | 2H 2.14* and 1.49                     | 2.14, 1H, d, J = 10.8        | H (2.14)-C15,<br>C16, C12                                        | H(2.14) - 2.93,<br>0.99                |
| 15       | 153.1                       | 1H 6.50*                              | s                            | C8, C13, C16,<br>C17, C14 (weak)                                 | 1.04, 1.59<br>(weak)                   |
| 16       | 138.0                       | -                                     | -                            | -                                                                | -                                      |
| 17       | 165.9                       | -                                     | -                            | -                                                                | -                                      |
| 18       | 28.9                        | 3H 1.24*                              | s                            | C3, C4, C5, C19                                                  | 1.08, 1.85,<br>2.16, 1.02<br>(weak)    |
| 19       | 182.1                       | -                                     | -                            | -                                                                | -                                      |
| 20       | 15.6                        | 3H 0.99*                              | s                            | C1, C5, C9, C10                                                  | 1.77, 2.14,<br>1.57, 1.88              |
| 19-O-CH3 | 51.4                        | 3H 3.73*                              | s                            | C17                                                              |                                        |

\* Distinct proton chemical shifts from  $^1\text{H}$  NMR 1D or 2D (COSY). The rest of the  $^1\text{H}$  chemical shifts were deduced from HSQC.

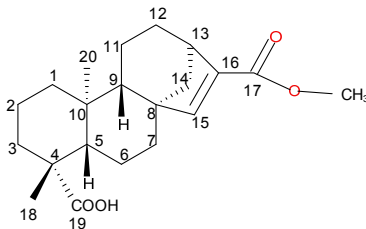

Supplement: 1014714108_st02.pdf [file 1014714108_st02.pdf]
