# Supplementary material
Source: PubMed Central journal article supplement (PMC3069164)

Kauralexin B3  $^1\text{H}$  (600 MHz),  $^{13}\text{C}$  (151 MHz), HMBC and NOESY NMR spectroscopic data for diterpene acid aldehydes in  $\text{CDCl}_3$ .  $^{13}\text{C}$  was also detected directly (126 MHz) using a 5 mm broadband (BBO) probe. Chemical shifts referenced to  $\delta(\text{CHCl}_3) = 7.26$  ppm for  $^1\text{H}$  and  $\delta(\text{CDCl}_3) = 77.16$  ppm for  $^{13}\text{C}$ . Coupling constants are given in Hertz [Hz].

| Position  | $\delta^{13}\text{C}$ [ppm] | $\delta^1\text{H}$ [ppm]                           | J coupling constants [Hz]                                   | HMBC correlations (C. No)                         | NOESY                                                                      |
|-----------|-----------------------------|----------------------------------------------------|-------------------------------------------------------------|---------------------------------------------------|----------------------------------------------------------------------------|
| 1         | 39.79                       | 2H 0.81 $\beta^*$ and 1.86 $\alpha^*$              | 0.81, 1H, dt, J = 13.3, 4.0; 1.86, 1H, "br dt", J = 13.5, 3 | H $\alpha$ - C3, C5, C9 (weak)                    | H $\alpha$ - 1.59, 0.92 (weak); H $\beta$ - 1.09, 1.18 (weak), 1.46 (weak) |
| 2         | 18.43<br>18.53<br>18.63     | 2H 1.645 $\alpha^*$ and 1.46 $\beta$               |                                                             |                                                   | H $\beta$ - 2.145                                                          |
| 3         | 34.38                       | 2H 2.145 $\alpha^*$ and 1.02 $\beta^*$             | 2.145, 1H, "br d", J = 14; 1.02, 1H, ~ddt, J = 1, 4.5, 13.8 | H $\alpha$ - C1 (weak), C5                        | H $\alpha$ - 9.74 (very weak)                                              |
| 4         | 48.57                       | -                                                  | -                                                           | -                                                 | -                                                                          |
| 5         | 56.33                       | 1H 1.18 $^*$                                       |                                                             | C1, C6 (18.43-18.63), C7, C19, C4 (weak)          | 1.01, 1.09                                                                 |
| 6         | 18.43<br>18.53<br>18.63     | 2H 1.90 $\beta^*$ and 1.67 $\alpha^*$ <sup>s</sup> | 1.67, 1H, "d" J = 9                                         |                                                   | H $\beta$ - 1.01, 9.74; H $\alpha$ - 9.74 (strong)                         |
| 7         | 38.33                       | 2H 1.67 $\beta^*$ <sup>s</sup> and 1.75 $\alpha^*$ |                                                             | H $\alpha$ - C5, C6, C9, C8; H $\beta$ - C14, C15 | H $\beta$ - 6.64; H $\alpha$ - 6.64 (weak)                                 |
| 8         | 50.62                       | -                                                  | -                                                           | -                                                 | -                                                                          |
| 9         | 45.39                       | 1H 1.09 $^*$                                       | "br d", J = 7                                               |                                                   | 0.81, 6.64, 1.18                                                           |
| 10        | 39.85                       | -                                                  | -                                                           | -                                                 | -                                                                          |
| 11        | 18.43<br>18.53<br>18.63     | 2H (1.59, 151) <sup>#</sup>                        |                                                             |                                                   | 1.86, 0.92 (weak)                                                          |
| 12        | 25.23                       | 2H 1.51 $^*$ and 1.640 $^*$                        |                                                             | H (1.51) - C16                                    |                                                                            |
| 13        | 40.36                       | 1H 2.95 $^*$                                       | m                                                           |                                                   | 2.140, 1.53                                                                |
| 14        | 43.47                       | 2H 2.140 $^*$ and 1.53 $^*$                        | 2.140, 1H, d, J = 10.6                                      | H (2.140) - C12, C15, C16; H (1.53) - C8, C9      | H (2.140) - 2.95, 0.92; H (1.53) - 2.95                                    |
| 15        | 155.69                      | 1H 6.64 $^*$                                       | s                                                           | C8, C13, C14, C17, C7 (weak)                      | 1.67, 1.09, 1.75 (weak)                                                    |
| 16        | 137.74                      | -                                                  | -                                                           | -                                                 | -                                                                          |
| 17        | 170.25                      | -                                                  | -                                                           | -                                                 | -                                                                          |
| H of COOH |                             | 11.3 $^*$                                          | br s                                                        |                                                   |                                                                            |
| 18        | 24.38                       | 3H 1.01 $^*$                                       | s                                                           | C4, C19, C3, C5                                   | 9.74, 1.18, 1.90                                                           |
| 19        | 205.85                      | 1H 9.74 $^*$                                       | d, J = 1.2                                                  | C3, C4                                            | 0.92 (strong), 1.67 (strong), 1.01, 1.90, 2.145 (very weak)                |
| 20        | 16.46                       | 3H 0.92 $^*$                                       | s                                                           | C5, C9, C1 and/or C10                             | 9.74 (strong), 2.140, 1.59, 1.67, 151, 1.86 (weak)                         |

\*Distinct proton chemical shifts from  $^1\text{H}$  NMR 1D or 2D (COSY). The rest of the  $^1\text{H}$  chemical shifts were deduced from HSQC. H of COOH at C17 was obtained from 1H NMR (500MHz). <sup>s</sup>signal composed of two overlapping  $^1\text{H}$  signal. <sup>#</sup>ambiguous assignment of 1.51, 1.59 at C11.

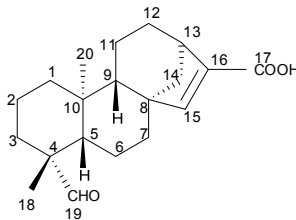

Supplement: 1014714108_st03.pdf [file 1014714108_st03.pdf]
